# Supplementary material for: Frontoparietal network activation is associated with motor recovery in ischemic stroke patients
Source: PubMed Central journal article supplement (PMC9492673; doi:10.1038/s42003-022-03950-4), 2022-09-21
Supplement: 42003_2022_3950_MOESM2_ESM.pdf [file 42003_2022_3950_MOESM2_ESM.pdf]

## Description of Additional Supplementary Files

**File name:** Supplementary Data 1

**Description:** Raw data to generate Figure 3.

**File name:** Supplementary Data 2

**Description:** Raw data to generate Figure 6e.
